# Supplementary material for: Higher ambient nitrogen dioxide is associated with an elevated risk of hospital-acquired acute kidney injury
Source: PubMed Central journal article supplement — Clin Kidney J. 2021 Sep 7;15(1):95–100. doi: 10.1093/ckj/sfab164 (PMC8757432; doi:10.1093/ckj/sfab164), 2021-09-07
Supplement: sfab164_supplementary_data.pdf [file sfab164_supplementary_data.pdf]

# Higher Ambient Nitrogen Dioxide Is Associated with An elevated Risk of Hospital-acquired Acute Kidney Injury

Pinghong He<sup>1,2\*</sup>, Ruixuan Chen<sup>1\*</sup>, Liping Zhou<sup>1\*</sup>, Yanqin Li<sup>1</sup>, Licong Su<sup>1</sup>, Jin Dong<sup>1</sup>, Yan Zha<sup>2</sup>, Yuxin Lin<sup>1</sup>, Sheng Nie<sup>1</sup>, Fan Fan Hou<sup>1</sup>, Xin Xu<sup>1</sup>, on behalf of the EACH study investigators

<sup>1</sup>Renal Division, Nanfang Hospital, Southern Medical University, The National Clinical Research Center for Kidney Disease, State Key Laboratory of Organ Failure Research, Guangzhou, China;

<sup>2</sup>Renal Division, Department of Medicine, Guizhou Provincial People's Hospital, Guizhou Provincial Institute of Nephritic and Urinary Disease, Guiyang 550002, Guizhou, China.

\*Equal contributors

**Correspondence to:** Xin Xu, Renal Division, Nanfang Hospital, Southern Medical University, 1838 North Guangzhou Avenue, Guangzhou 510515, China.

**Email:** [xux007@163.com](mailto:xux007@163.com);

**Tel:** +86-20-61641591; **Fax:** 86-20-87281713.

**Abstract word count:** 302

**Text word count:** 2250

**Number of References:** 29

**Number of Tables and Figures:** 5

**Supplementary Table number:** 1

**Supplementary Figure number:** 1

## Supplemental Materials

**Table S1. Spearman correlation coefficients among the daily averages of different air pollutants**

| <b>Pollutant</b>        | <b>PM<sub>2.5</sub></b> | <b>PM<sub>10</sub></b> | <b>NO<sub>2</sub></b> | <b>SO<sub>2</sub></b> | <b>CO</b> | <b>O<sub>3</sub></b> |
|-------------------------|-------------------------|------------------------|-----------------------|-----------------------|-----------|----------------------|
| <b>PM<sub>2.5</sub></b> | 1.00                    | 0.91                   | 0.69                  | 0.67                  | 0.69      | 0.09                 |
| <b>PM<sub>10</sub></b>  |                         | 1.00                   | 0.68                  | 0.70                  | 0.64      | 0.12                 |
| <b>NO<sub>2</sub></b>   |                         |                        | 1.00                  | 0.60                  | 0.62      | -0.01                |
| <b>SO<sub>2</sub></b>   |                         |                        |                       | 1.00                  | 0.54      | 0.08                 |
| <b>CO</b>               |                         |                        |                       |                       | 1.00      | -0.18                |
| <b>O<sub>3</sub></b>    |                         |                        |                       |                       |           | 1.00                 |

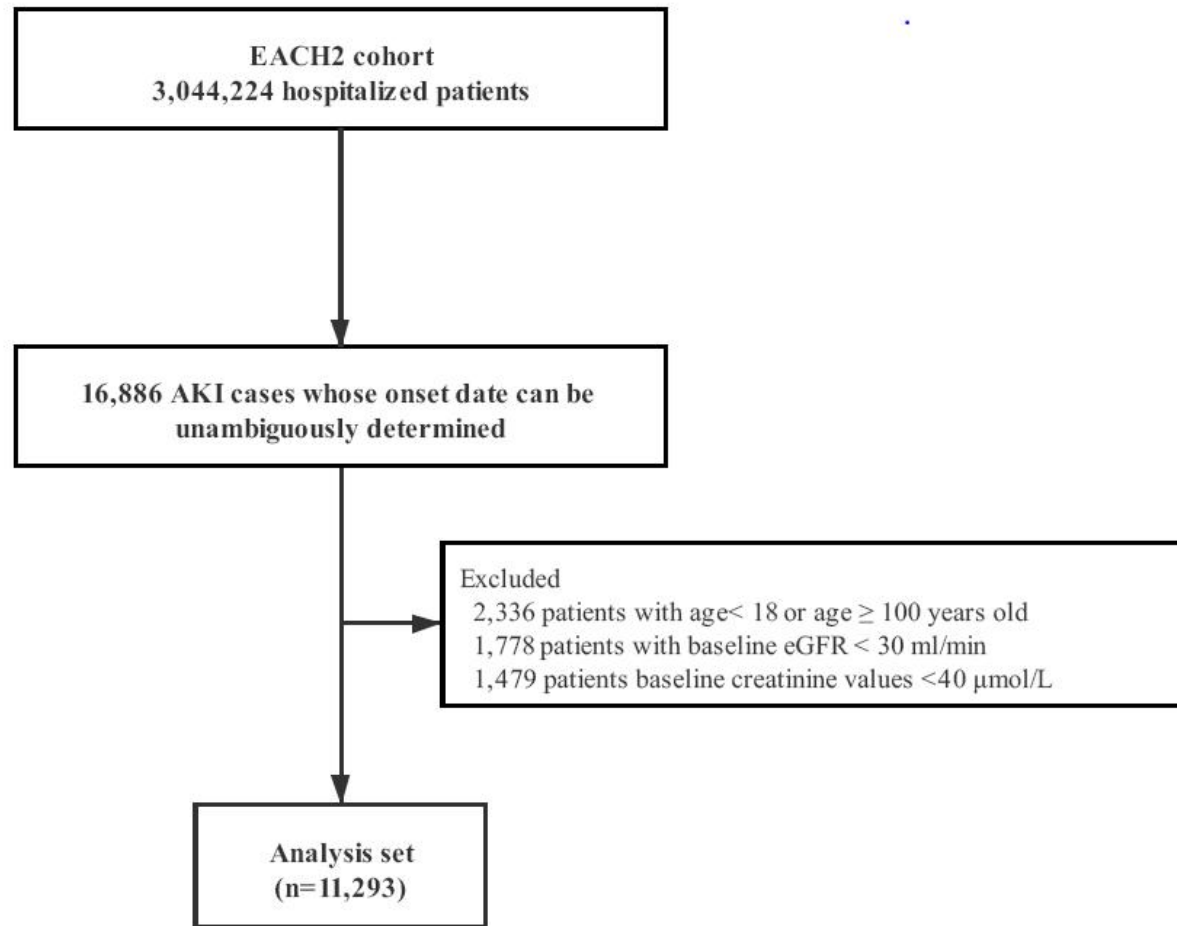

Figure S1. The Flowchart of Patient Selection.
